# Supplementary material
Source: Springer Nature journal article supplement (http://www.nature.com/nsmb/journal/vaop/ncurrent/extref/nsmb.2020-S1.pdf)
Supplement: nsmb.2020-S1.pdf [file nsmb.2020-S1.pdf]

Browse Articles
| Nature Structural & Molecular Biology


Skip to main content

Thank you for visiting nature.com. You are using a browser version with limited support for CSS. To obtain
the best experience, we recommend you use a more up to date browser (or turn off compatibility mode in
Internet Explorer). In the meantime, to ensure continued support, we are displaying the site without styles
and JavaScript.

Advertisement


- View all journals
- Search
- Log in

- Explore content
- About the journal
- Publish with us

- Sign up for alerts
- RSS feed


1. nature
2. nature structural & molecular biology
3. browse articles

# Browse Articles

## Filter By:

Article Type

All

- All
- Article (3322)
- Author Correction (61)
- Book Review (39)
- Brief Communication (229)
- Commentary (53)
- Correspondence (202)
- Corrigendum (77)
- Editorial (238)
- Erratum (75)
- History (50)
- Letter (495)
- News & Views (1222)
- Obituary (36)
- Perspective (67)
- Picture Story (111)
- Research Highlight (50)
- Research Highlights (163)
- Resource (54)
- Review Article (160)
- Technical Report (36)

Year

All

- All
- 2024 (116)
- 2023 (262)
- 2022 (186)
- 2021 (167)
- 2020 (180)
- 2019 (180)
- 2018 (169)
- 2017 (164)
- 2016 (190)
- 2015 (204)
- 2014 (185)
- 2013 (264)
- 2012 (270)
- 2011 (253)
- 2010 (262)
- 2009 (258)
- 2008 (246)
- 2007 (258)
- 2006 (239)
- 2005 (254)

- ### Molecular basis of Gabija anti-phage supramolecular assemblies

  The Gabija system constitutes one of the most prevalent anti-phage defense systems and is composed of GajA and GajB. Here, using cryo-EM and biochemistry, the authors show that GajA and GajB form a supramolecular complex with a stoichiometry of 4:4 to promote anti-phage defense.

  - Xiao-Yuan Yang
  - Zhangfei Shen
  - Tian-Min Fu

  Article16 Apr 2024
- ### Structure of the γ-tubulin ring complex-capped microtubule

  The authors report that the γ-tubulin ring complex (γ-TuRC), an essential regulator of microtubule formation, selectively nucleates microtubules with 13-protofilaments and characterize the structural transformations associated with this function.

  - Amol Aher
  - Linas Urnavicius
  - Tarun M. Kapoor

  Article12 Apr 2024
- ### Structure of the native γ-tubulin ring complex capping spindle microtubules

  Using cryo-electron tomography, Dendooven et al. determined the structure of the native budding yeast γ-tubulin ring complex (γTuRC) capping spindle microtubules and showed that γTuRC adopts an active closed conformation to function as a perfect geometric template for microtubule nucleation.

  - Tom Dendooven
  - Stanislau Yatskevich
  - David Barford

  ArticleOpen Access12 Apr 2024
- ### Noncanonical assembly, neddylation and chimeric cullin–RING/RBR ubiquitylation by the 1.8 MDa CUL9 E3 ligase complex

  Here, using cryo-EM, biochemistry and cell biology, the authors reveal the unique assembly, catalytic mechanism, multimodal substrate recruitment and regulation of the atypical ubiquitin ligase complex CUL9–RBX1.

  - Daniel Horn-Ghetko
  - Linus V. M. Hopf
  - Brenda A. Schulman

  ArticleOpen Access11 Apr 2024
- ### Visualizing chaperone-mediated multistep assembly of the human 20S proteasome

  Precise protease positioning and gating of the proteasome core require the ordered assembly of 28 subunits. Cryo-EM structures of seven intermediates visualize five dedicated chaperones and three propeptides mediating step-by-step assembly of the human 20S proteasome.

  - Frank Adolf
  - Jiale Du
  - Brenda A. Schulman

  ArticleOpen Access10 Apr 2024
- ### Mechanism of autocatalytic activation during proteasome assembly

  To prevent promiscuous protein degradation, proteasomes are initially assembled as inactive complexes. Their activation is autocatalytic and coupled to assembly. Here the authors uncover key aspects of the autocatalytic activation mechanism.

  - Benjamin Velez
  - Richard M. Walsh Jr.
  - John Hanna

  Article10 Apr 2024
- ### Structure of adenylyl cyclase 5 in complex with Gβγ offers insights into *ADCY5*-related dyskinesia

  The authors describe the structure of an adenylyl cyclase 5 and Gβγ complex, which potentially influences a neural signalling pathway modulating motor function. Mutations in the Gβγ binding site on AC5 are linked to heritable forms of dyskinesia.

  - Yu-Chen Yen
  - Yong Li
  - John J. G. Tesmer

  Article08 Apr 2024
- ### Transport mechanism of presynaptic high-affinity choline uptake by CHT1

  The authors report the structures of human CHT1 in the outward-open, inward-occluded and inward-open states, reveal the mechanism of HC-3 inhibition and choline recognition and elucidate the regulatory role of the intracellular helix IH1.

  - Yunlong Qiu
  - Yiwei Gao
  - Yan Zhao

  Article08 Apr 2024
- ### Author Correction: Structural basis for partial agonism in 5-HT3A receptors

  - Kevin Felt
  - Madeleine Stauffer
  - Sudha Chakrapani

  Author Correction05 Apr 2024
- ### SCAF1 drives the compositional diversity of mammalian respirasomes

  Here the authors structurally characterize respiratory supercomplexes, revealing that, in addition to the known ‘canonical’ respirasome, mammalian mitochondria contain two novel respirasome types, one of which incorporates supercomplex assembly factor SCAF1.

  - Irene Vercellino
  - Leonid A. Sazanov

  Article04 Apr 2024
- ### A rare genetic variant biases maternal meiotic recombination toward risk of pregnancy loss

  Pregnancy loss is common in humans, but maternal genetic factors modulating its incidence are largely unknown. In a meta-analysis of genome-wide association studies, researchers identified a genetic variant that seems to increase risk of pregnancy loss by dysregulating meiotic recombination between homologous chromosomes during egg formation.

  - Sara A. Carioscia
  - Rajiv C. McCoy

  News & Views03 Apr 2024
- ### Shifting our perspective on orphan G protein-coupled receptors

  G protein-coupled receptors (GPCRs) with no known endogenous ligand are termed orphans. Deorphanization of a GPCR involves identifying the ligand, which can be a painstaking exercise. In this Comment, we discuss the challenges in the process, its role in drug discovery and alternative approaches to characterizing orphan GPCRs.

  - Nicola J. Smith
  - Fiona Murray

  Comment02 Apr 2024
- ### Molecular basis for Gβγ-mediated activation of phosphoinositide 3-kinase γ

  Phosphoinositide 3-kinase γ plays critical roles in neutrophil chemotaxis and cancer metastasis. Here, using cryo-EM and functional studies, the authors reveal how two molecules of a key activator, Gβγ, bind to and alter the conformation of the enzyme.

  - Chun-Liang Chen
  - Ramizah Syahirah
  - John J. G. Tesmer

  Article02 Apr 2024
- ### High-resolution structures of amyloid-β and tau aggregates in individuals with Down syndrome

  Cryo-electron microscopy of brain tissue from two individuals with Down syndrome showed amyloid-β (Aβ) and tau filaments identical to those found in individuals with sporadic or dominantly inherited Alzheimer disease (AD), but also two types of Aβ40 filaments with distinct structures different from those previously reported in AD and cerebral amyloid angiopathy.

  Research Briefing29 Mar 2024
- ### Cryo-EM structures of amyloid-β and tau filaments in Down syndrome

  Here, using cryo-EM, authors reveal that amyloid-β and tau are identical in Alzheimer disease and Down syndrome. This has implications for assessing whether adults with Down syndrome could be included in Alzheimer disease clinical trials.

  - Anllely Fernandez
  - Md Rejaul Hoq
  - Ruben Vidal

  ArticleOpen Access29 Mar 2024
- ### A personal perspective of the voltage-gated potassium channel studies

  The identification of sodium and potassium currents as underlying action potential propagation, more than 70 years ago, opened a new avenue of research into the role of ion channels. In this Comment, we present our personal perspectives of the field, from the identification of Shaker as a potential potassium channel to the mechanistic insights available to us today.

  - Lily Yeh Jan
  - Yuh Nung Jan

  Comment28 Mar 2024
- ### An oligopeptide permease, OppABCD, requires an iron–sulfur cluster domain for functionality

  Here, four cryo-EM structures of *Mtb* OppABCD reveal an assembly of a cluster C substrate-binding protein and its translocator, as well as the [4Fe–4S] cluster-regulated transport mechanism of oligopeptide permeases found in bacteria.

  - Xiaolin Yang
  - Tianyu Hu
  - Bing Zhang

  Article28 Mar 2024
- ### Structural insights into the decoding capability of isoleucine tRNAs with lysidine and agmatidine

  Precise protein synthesis is achieved by tRNA modifications. Here the authors revealed that modified cytidines in tRNAIle use their long side chains to make additional interactions with mRNA for stable tRNA binding on the ribosome.

  - Naho Akiyama
  - Kensuke Ishiguro
  - Tsutomu Suzuki

  Article27 Mar 2024
- ### Structures of the ribosome bound to EF-Tu–isoleucine tRNA elucidate the mechanism of AUG avoidance

  Rybak and Gagnon elucidate the mechanism of AUG codon avoidance by the minor isoleucine tRNA in *Escherichia coli*. The lysidinylated C34 in the anticodon loop of tRNAIle weakens interactions with the mRNA and destabilizes the EF-Tu ternary complex.

  - Mariia Yu. Rybak
  - Matthieu G. Gagnon

  Article27 Mar 2024
- ### Molecular stripping underpins derepression of a toxin–antitoxin system

  Transcription of toxin–antitoxin modules is regulated by conditional cooperativity, where the toxin enables or disrupts antitoxin-driven repression. Here, the authors solve the structural basis for the conditional cooperativity of *Salmonella* TacAT3.

  - Grzegorz J. Grabe
  - Rachel T. Giorgio
  - Sophie Helaine

  Article27 Mar 2024

- Previous page
- page 1
- page 2
- page 3
- …
- page 349
- Next page

## Explore content

- Research articles
- Reviews & Analysis
- News & Comment
- Current issue
- Collections

- Follow us on Twitter
- Sign up for alerts
- RSS feed


## About the journal

- Aims & Scope
- Journal Information
- Journal Metrics
- About the Editors
- Research Cross-Journal Editorial Team
- Reviews Cross-Journal Editorial Team
- Our publishing models
- Editorial Values Statement
- Editorial Policies
- Content Types
- Posters
- Web Feeds
- Contact


## Publish with us

- Submission Guidelines
- For Reviewers
- Language editing services
- Submit manuscript

## Search

Search articles by subject, keyword or author

Show results from

All journals
This journal

Search

Advanced search

### Quick links

- Explore articles by subject
- Find a job
- Guide to authors
- Editorial policies

Nature Structural & Molecular Biology (*Nat Struct Mol Biol*)

ISSN 1545-9985 (online)

ISSN 1545-9993 (print)

## nature.com sitemap

### About Nature Portfolio

- About us
- Press releases
- Press office
- Contact us

### Discover content

- Journals A-Z
- Articles by subject
- protocols.io
- Nature Index

### Publishing policies

- Nature portfolio policies
- Open access

### Author & Researcher services

- Reprints & permissions
- Research data
- Language editing
- Scientific editing
- Nature Masterclasses
- Research Solutions

### Libraries & institutions

- Librarian service & tools
- Librarian portal
- Open research
- Recommend to library

### Advertising & partnerships

- Advertising
- Partnerships & Services
- Media kits
- Branded
  content

### Professional development

- Nature Careers
- Nature 
  Conferences

### Regional websites

- Nature Africa
- Nature China
- Nature India
- Nature Italy
- Nature Japan
- Nature Middle East

- Privacy
  Policy
- Use
  of cookies
- Your privacy choices/Manage cookies
- Legal
  notice
- Accessibility
  statement
- Terms & Conditions
- Your US state privacy rights

© 2024 Springer Nature Limited

xml version="1.0" encoding="UTF-8"?
